# Supplementary material for: Asynchronous magnetic bead rotation (AMBR) biosensor in microfluidic droplets for rapid bacterial growth and susceptibility measurements
Source: Royal Society of Chemistry journal article supplement (doi:10.1039/c0lc00734j), 2011-01-01
Supplement: c0lc00734j.pdf [file c0lc00734j.pdf]

## **Supplementary Information**

### **Supplementary Video 1**

Real-time video corresponding to Figure 4 at 0 minutes. An 8.8  $\mu\text{m}$  magnetic bead with a small bacterial cell population attached within a rotating magnetic field.

### **Supplementary Video 2**

Real-time video corresponding to Figure 4 at 30 minutes. An 8.8  $\mu\text{m}$  magnetic bead with a small bacterial cell population attached within a rotating magnetic field after 30 minutes of growth.

### **Supplementary Video 3**

Real-time video corresponding to Figure 4 at 60 minutes. An 8.8  $\mu\text{m}$  magnetic bead with a small bacterial cell population attached within a rotating magnetic field after 60 minutes of growth.
